# Supplementary material
Source: PubMed Central journal article supplement (PMC6645815)
Supplement: ao7b01878_si_001.pdf [file ao7b01878_si_001.pdf]

# Supporting Information

## Phytochemicals as dynamic surface ligands to control nanoparticle-protein interactions

*Amanda N. Abraham<sup>†</sup>, Tarun K. Sharma<sup>†</sup>, Vipul Bansal<sup>†\*</sup> and Ravi Shukla<sup>†‡\*</sup>*

<sup>†</sup>Ian Potter NanoBioSensing Facility, NanoBiotechnology Research Lab (NBRL), School of Science, RMIT University, GPO Box 2476 V, Melbourne (VIC) 3001, AUSTRALIA.

<sup>‡</sup>Centre for Advanced Materials & Industrial Chemistry, School of Science, RMIT University, GPO Box 2476 V, Melbourne (VIC) 3001, AUSTRALIA.

\*Email: ravi.shukla@rmit.edu.au (R.S.); vipul.bansal@rmit.edu.au (V.B.)

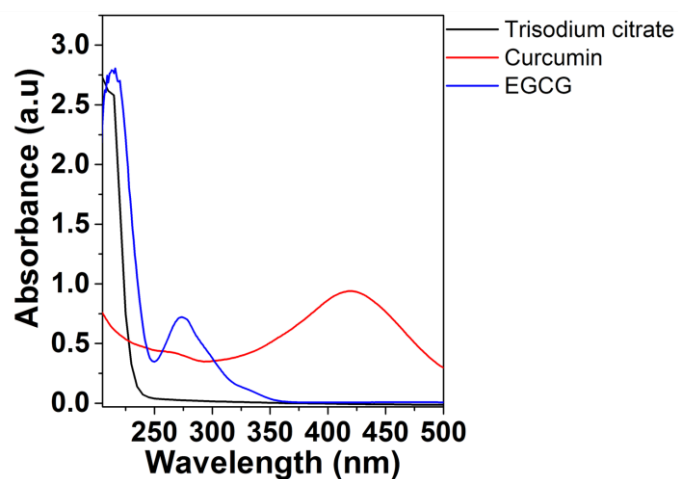

**Figure S1:** UV-visible absorbance spectra of pristine trisodium citrate, curcumin and EGCG. Trisodium citrate displays a band at 209 nm,<sup>1</sup> curcumin at 263 nm and 417 nm<sup>2</sup> and EGCG at 235 nm and 273 nm.<sup>3</sup>

## REFERENCES

1. Krukowski, S. et al. *Journal of Food and Drug Analysis* **2017**, 25 (3), 717-722.
2. Rodrigues, M. A. et al. *American Journal of Chemistry* **2012**, 2 (3), 157-159.
3. Snitsarev, V. et al. *PLoS ONE* **2013**, 8 (11), e79834.

**Table S1:** Hydrodynamic diameters (obtained from number averaged dynamic light scattering data) and zeta potential for Ct-AgNP, Cur-AgNPs and EGCG-AgNPs. NP concentration was 100  $\mu$ M in the presence and absence of HSA (3  $\mu$ M) in phosphate buffer at pH 7.4.

|                     | Ct-AgNPs        | Ct-AgNPs + HSA  | Cur-AgNPs       | Cur-AgNPs + HSA | EGCG-AgNPs      | EGCG-AgNPs + HSA |
|---------------------|-----------------|-----------------|-----------------|-----------------|-----------------|------------------|
| DLS (nm)            | 55.6 $\pm$ 5.7  | 61.6 $\pm$ 7.8  | 44.8 $\pm$ 2.5  | 57.9 $\pm$ 6.5  | 61.5 $\pm$ 3.8  | 67.7 $\pm$ 9.5   |
| Zeta potential (mV) | -25.9 $\pm$ 1.2 | -16.5 $\pm$ 2.5 | -41.7 $\pm$ 3.2 | -31.3 $\pm$ 4.1 | -38.9 $\pm$ 2.6 | -32.7 $\pm$ 3.6  |

**Table S2:** Stern-Volmer constants and thermodynamic parameters for Ct-AgNPs.

| Temperature<br>(K) | $K_{sv}$<br>( $10^4 \text{ M}^{-1}$ ) | $K_q$<br>( $\times 10^{13} \text{ M}^{-1} \text{ s}^{-1}$ ) | $K$<br>( $\text{M}^{-1}$ ) | $\Delta G^\circ$<br>kJ/mol | $\Delta H^\circ$<br>J/mol | $\Delta S^\circ$ J/K<br>mol |
|--------------------|---------------------------------------|-------------------------------------------------------------|----------------------------|----------------------------|---------------------------|-----------------------------|
| 293                | 7.43                                  | 0.74                                                        | 6.66                       | -1.23                      | 3.99                      | 4.22                        |
| 303                | 9.55                                  | 0.96                                                        | 27.71                      | -1.28                      | 3.86                      |                             |
| 313                | 11.63                                 | 1.16                                                        | 38.46                      | -1.32                      | 3.74                      |                             |
| 323                | 15.50                                 | 1.55                                                        | 150.54                     | -1.36                      | 3.62                      |                             |
| 333                | 17.61                                 | 1.76                                                        | 419.13                     | -1.40                      | 3.51                      |                             |

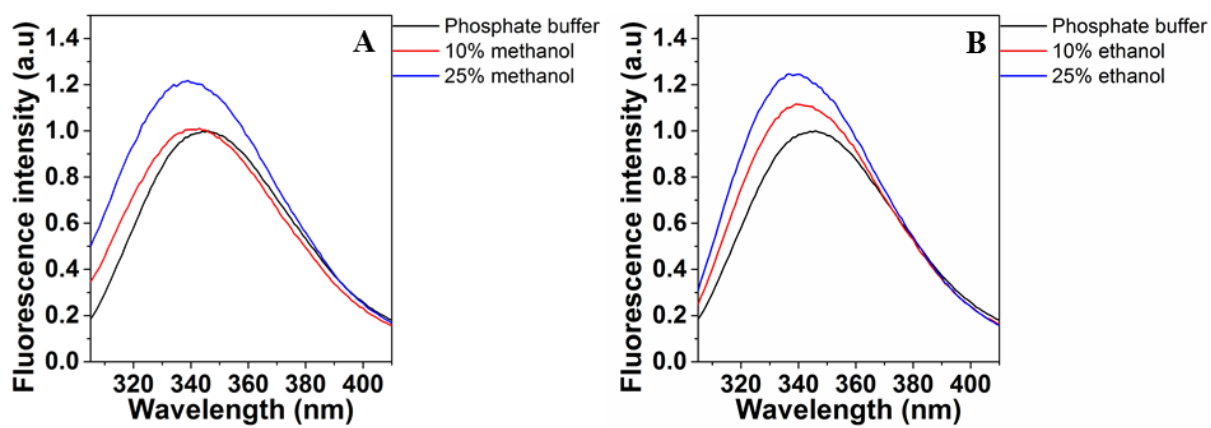

**Figure S2.** Fluorescence spectra of HSA in a less polar environment obtained through its exposure to either methanol or ethanol (v/v %).

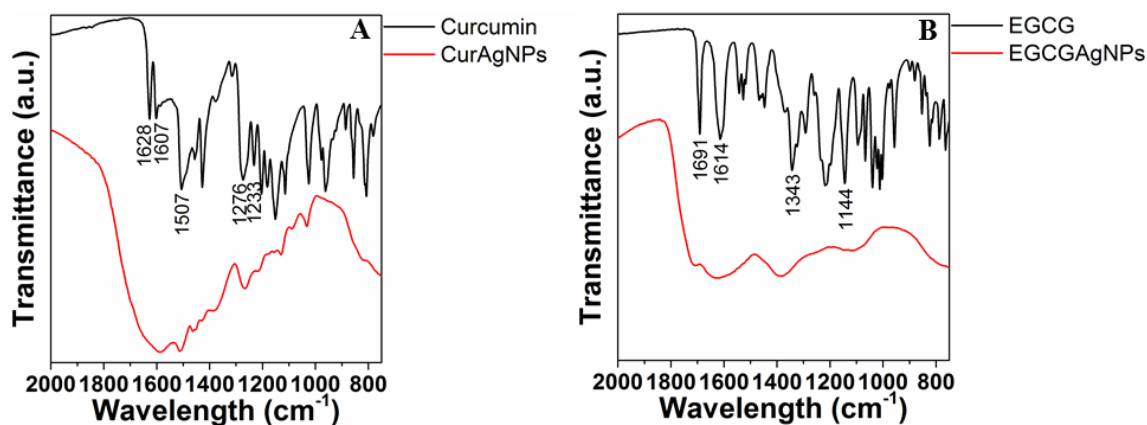

**Figure S3.** FTIR spectra of (A) Cur-AgNPs and (B) EGCG-AgNPs, in comparison with curcumin and EGCG, respectively. In pristine curcumin, the vibrational band observed at  $1628\text{ cm}^{-1}$  corresponds to a mixed C=O and C=C character and the neighbouring  $1607\text{ cm}^{-1}$  is attributed to the aromatic ring stretching in curcumin.<sup>1</sup> In Cur-AgNPs, these peaks have been replaced by a broad peak at  $1582\text{ cm}^{-1}$ . Additionally, the peak assigned to C=O at  $1507\text{ cm}^{-1}$  has also shifted to  $1512\text{ cm}^{-1}$ . This indicates that the carbonyl groups in curcumin are involved in the AgNP synthesis. The enol C–O peak at  $1276\text{ cm}^{-1}$  and the keto peak at  $1233\text{ cm}^{-1}$  have both shifted to  $1266$  and  $1218$ , respectively, in Cur-AgNPs, which indicates the additional involvement of both these phenol groups in the AgNP synthesis.

In the case of EGCG system (B), the characteristic vibrational mode in pristine EGCG at  $1343\text{ cm}^{-1}$  corresponding to the O–H in-plane bending<sup>38</sup> has disappeared in the EGCG-AgNPs, whereas the  $1144\text{ cm}^{-1}$  feature corresponding to the O–H aromatic vibration<sup>2</sup> is replaced by a broad peak. The peaks at  $1691\text{ cm}^{-1}$  and  $1614\text{ cm}^{-1}$  which correspond to the C=O<sup>38</sup> have shifted to  $1704\text{ cm}^{-1}$  and a broad peak at  $1620\text{ cm}^{-1}$ , respectively. This indicates the likely involvement of a number of phenol groups in EGCG in AgNP synthesis.

## REFERENCES

1. Mohan, P. R. K. et al. *Vibrational Spectroscopy* **2012**, *62*, 77-84.
2. Zhu, H. et al. *Sensors and Actuators B: Chemical* **2013**, *185*, 608-619.

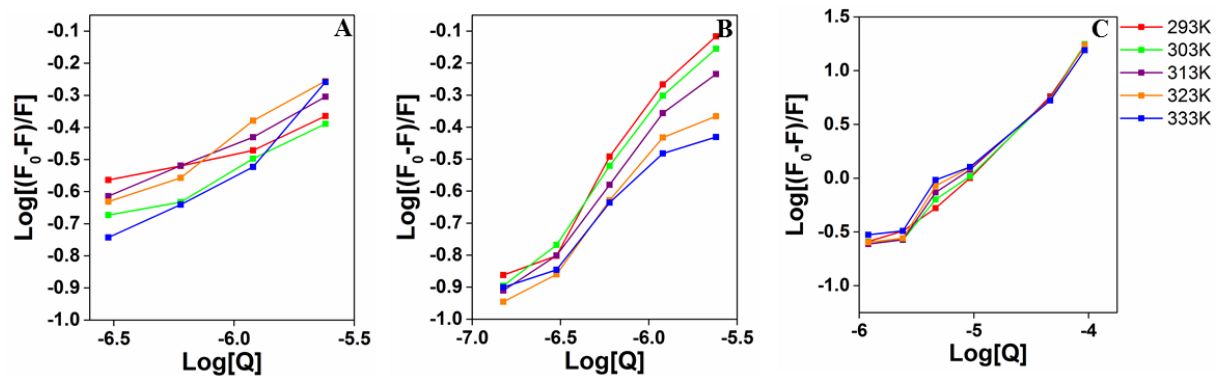

**Figure S4.** Double logarithmic regression plots of  $\log[(F_0-F)/F]$  versus  $\log[Q]$  for binding of (A) Ct-AgNPs, (B) Cur-AgNPs and (C) EGCG-AgNPs to HSA, from which the binding constants ( $K$ ) were calculated.

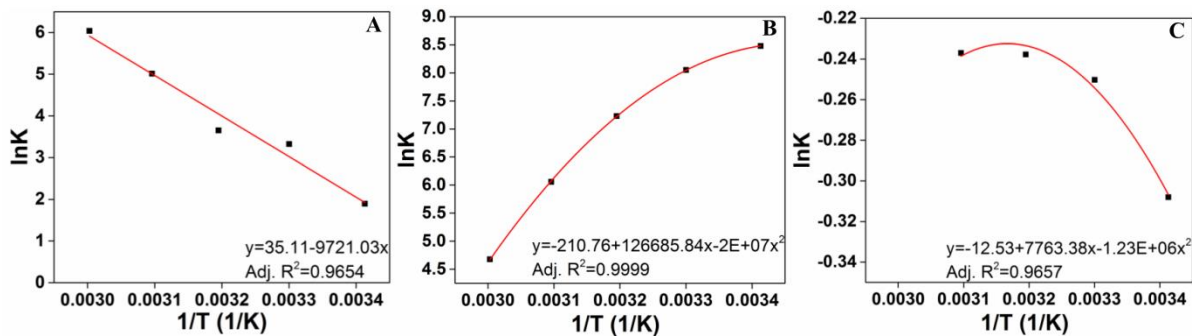

**Figure S5.** van't Hoff plots for (A) Ct-AgNPs, (B) Cur-AgNPs and (C) EGCG-AgNPs, from which the thermodynamic parameters were calculated to determine the nature of binding involved in the interaction of the AgNPs to HSA.
